# Supplementary material for: Integrated GWAS and multi-omics reveal rapid JA signaling activation orchestrated by OsJAR2 to drive Southern Rice Black-Streaked Dwarf Virus resistance in rice
Source: Research Square preprint supplement (doi:10.21203/rs.3.rs-6552093/v1), 2025-05-09
Supplement: Supplementary file 1 [file 2b6fb4b5722534fa90a77aef.xlsx]

## Sheet: Table S1
Table S1. Disease incidence of 195 rice accessions in field trial.
Accession Number	Incidence (%;artificial inoculation)	Incidence (%;field trial)	Country	Region
1	69.2666	5.71895	Bangladesh	SAC
2	69.9134	10.9375	Bangladesh	SAC
3	70.4455	19.697	Bangladesh	SAC
4	70.6288	12.1622	Bangladesh	SAC
5	78.4214	2.94118	Bangladesh	SAC
6	86.8455	4.6875	Bangladesh	SAC
7	93.0569	16.3664	Bangladesh	SAC
8	93.2553	65.5172	Bangladesh	SAC
9	94.08	11.6298	Bangladesh	SAC
10	95.4406	18.1985	Bangladesh	SAC
11	96.7305	13.8112	Bangladesh	SAC
12	98.3333	0	Bangladesh	SAC
13	55.23	12.1622	Bhutan	SAE
14	84.9278	NA	Bhutan	SAE
15	88.0513	61.9949	Bhutan	SAE
16	96.2013	35.8628	Bhutan	SAE
17	78.5348	81.8056	Brazil	SAM
18	84.7253	50	Brazil	SAM
19	95.8889	21.0526	Brazil	SAM
20	42.8458	61.0522	China	EAS
21	49.82	18.1849	China	EAS
22	53.387	15.1282	China	EAS
23	70.8113	7.47029	China	EAS
24	72.8395	12.8571	China	EAS
25	73.1041	17.8571	China	EAS
26	80.23	47.2222	China	EAS
27	81.5789	78.7135	China	EAS
28	82.62	35.7287	China	EAS
29	85.4497	14.2568	China	EAS
30	85.4497	24.2857	China	EAS
31	86.1026	63.5468	China	EAS
32	86.5	45.7207	China	EAS
33	86.716	65.1442	China	EAS
34	87.5458	86.9748	China	EAS
35	87.9903	39.2121	China	EAS
36	88.52	54.4192	China	EAS
37	88.8889	38.7626	China	EAS
38	89.0653	67.6822	China	EAS
39	89.5777	28.6813	China	EAS
40	91.0317	75.1987	China	EAS
41(S1)	91.1215	47.3214	China	EAS
42	92	91.5584	China	EAS
43	92.1162	36.7788	China	EAS
44	92.2222	9.81717	China	EAS
45	92.3989	49.4805	China	EAS
46	93.5507	25.2134	China	EAS
47	94.2912	24.1441	China	EAS
48	94.5556	44.385	China	EAS
49	95.3571	10.5263	China	EAS
50	98.5507	39.5511	China	EAS
51	100	72.2167	China	EAS
52	75.7055	27.5	Costa_Rica	CAM
53	100	60.6061	Costa_Rica	CAM
54	50.5983	42.7033	Cuba	CAM
55	89	22.2222	Cuba	CAM
56	88.0952	44.6524	Dominican_Rp	CAM
57	91.4903	16.1726	Dominican_Rp	CAM
58	84.9673	39.6429	Ecuador	SAM
59	90.9195	12.2312	Egypt	NAF
60	72.4561	0	Ghana	WAF
61	75.4966	10.6696	Guatemala	CAM
62	93.43	67.5439	Guatemala	CAM
63(R91)	50.7109	0	India	SAC
64	69.0613	16.2934	India	SAC
65	69.1198	35.5204	India	SAC
66	74.2146	35.6764	India	SAC
67	76.1336	4.66531	India	SAC
68	76.6921	27.0303	India	SAC
69	78.4188	14.2857	India	SAC
70	80.8377	11.6883	India	SAC
71	81.99	19.0625	India	SAC
72	85.582	9.2674	India	SAC
73	87.2858	11.4583	India	SAC
74	88.47	25.2381	India	SAC
75	88.8594	13.4101	India	SAC
76	89.4286	10.3448	India	SAC
77	89.7701	41.7105	India	SAC
78	92.1134	23.8859	India	SAC
79	92.27	6.89655	India	SAC
80	92.3077	9.21053	India	SAC
81	92.4014	0	India	SAC
82	96.0784	51.1936	India	SAC
83	96.1538	11.5546	India	SAC
84	96.59	92.8886	India	SAC
85	97.619	4.7619	India	SAC
86	70.9707	16.3012	Indonesia	SER
87	81.0166	11.9488	Indonesia	SER
88	85.0309	91.8919	Indonesia	SER
89	97.6	42.8571	Indonesia	SER
90	93.7322	34.0909	Japan	EAS
91	76.4839	17.3212	Kenya	EAF
92	78.68	18.3333	Korea_Rep	EAR
93	80.5747	26.2899	Korea_Rep	EAR
94	91.6667	73.2194	Korea_Rep	EAR
95	71.96	26.941	Laos	SEA
96	83.2404	63.3333	Laos	SEA
97	84.0981	48.5088	Laos	SEA
98	82.1429	58.9864	Madagascar	IOC
99	82.716	44.697	Madagascar	IOC
100	85.8586	30.6349	Madagascar	IOC
101	85.8974	28.7338	Madagascar	IOC
102	86.3048	3.7037	Madagascar	IOC
103	86.9539	47.5758	Madagascar	IOC
104	87.9825	51.4286	Madagascar	IOC
105	88.042	47.5	Madagascar	IOC
106	90.7407	43.4783	Madagascar	IOC
107	91.5685	21.0337	Madagascar	IOC
108	96.1039	59.0659	Madagascar	IOC
109	98.6667	58.0392	Madagascar	IOC
110	55.2327	6.19006	Malaysia	SER
111	89.0015	36.3707	Mali	WAF
112	92.3633	20	Mauritania	NAF
113	97.5309	17.9487	Mauritius	IOC
114	63.22	1.51515	Myanmar	SEA
115	89.4268	14	Myanmar	SEA
116	90.8205	57.5	Myanmar	SEA
117	91.6982	16.7964	Myanmar	SEA
118	100	39.7059	Myanmar	SEA
119	82.25	4.34609	Nepal	SAC
120	92.9803	33.0769	Nepal	SAC
121	95.042	28.7879	Nepal	SAC
122	90.2778	26.4815	Panama	CAM
123	59.3936	1.25	Philippines	SER
124	60.1107	5.33428	Philippines	SER
125	61.5627	15.7407	Philippines	SER
126	62.0988	4.84914	Philippines	SER
127	63.7531	8.26255	Philippines	SER
128	65.6371	5.7563	Philippines	SER
129	68.532	17.5	Philippines	SER
130	68.7901	16.0384	Philippines	SER
131	72.8307	12.8788	Philippines	SER
132	77.0563	19.7723	Philippines	SER
133	80.7143	20.8333	Philippines	SER
134	83.8259	24.5951	Philippines	SER
135	86.7284	19.1026	Philippines	SER
136	86.9579	12.8205	Philippines	SER
137	88.0392	14.4958	Philippines	SER
138	92.6901	11.9844	Philippines	SER
139	93.4409	7.90021	Philippines	SER
140	94.1026	15.4887	Philippines	SER
141	94.6667	36.8298	Philippines	SER
142	98.6667	26.1607	Philippines	SER
143	100	8.61345	Philippines	SER
144	69.5785	10.101	Senegal	WAF
145	71.6536	7.57576	Senegal	WAF
146	74.7483	8.88158	Senegal	WAF
147	79.2501	8.49673	Senegal	WAF
148	80.0081	1.28205	Senegal	WAF
149	80.88	9.90741	Senegal	WAF
150	81.799	20.8502	Senegal	WAF
151	86.4198	22.2059	Senegal	WAF
152	89.1975	12.4402	Senegal	WAF
153	94.2118	36.0504	Senegal	WAF
154	57.7586	14.4231	Sri_Lanka	IOC
155	63.0808	63.5081	Sri_Lanka	IOC
156	66.629	24.053	Sri_Lanka	IOC
157	68.0098	47.2571	Sri_Lanka	IOC
158	68.5	6.38945	Sri_Lanka	IOC
159	70.94	8.08333	Sri_Lanka	IOC
160	74.5455	4.07925	Sri_Lanka	IOC
161	74.5756	14.1633	Sri_Lanka	IOC
162	74.9512	49.7365	Sri_Lanka	IOC
163	75.2601	47.4265	Sri_Lanka	IOC
164	77.2325	8.13187	Sri_Lanka	IOC
165	77.2806	18.1081	Sri_Lanka	IOC
166	79.1358	63.6667	Sri_Lanka	IOC
167	81.1111	10.6286	Sri_Lanka	IOC
168	81.3538	6.66667	Sri_Lanka	IOC
169	85.3307	29.7241	Sri_Lanka	IOC
170	88.0645	12.1429	Sri_Lanka	IOC
171	88.8278	7.14286	Sri_Lanka	IOC
172	88.933	90.3077	Sri_Lanka	IOC
173	89.1642	2.77778	Sri_Lanka	IOC
174	89.2416	5.76923	Sri_Lanka	IOC
175	89.411	13.3826	Sri_Lanka	IOC
176	90.0536	50	Sri_Lanka	IOC
177	90.3788	14.2857	Sri_Lanka	IOC
178	91.2281	21.274	Sri_Lanka	IOC
179	93.9169	1.6129	Sri_Lanka	IOC
180	97.3162	41.7735	Sri_Lanka	IOC
181	72.0058	19.2857	Suriname	SAM
182	83.6986	3.33333	China	EAR
183	91.9048	46.7411	China	EAR
184	96	48.7179	China	EAR
185	69.53	18.0556	Thailand	SEA
186	78.8304	44.4257	Thailand	SEA
187	88.2082	80.5254	Thailand	SEA
188	94.5419	57.7922	Thailand	SEA
189	97.3333	15.702	Thailand	SEA
190	90.4762	28.8235	United_States_of_America	NAM
191	80.9927	20.3169	Burkina_Faso	WAF
192	81.8342	7.31602	Viet_Nam	SEA
193	87.5	42.2222	Viet_Nam	SEA
194	95.6522	42.6471	Viet_Nam	SEA
195	98.8506	2.5641	Viet_Nam	SEA
Notes: IRGC number is the record in the International Rice Information System. CAM, Central America and Caribbean; EAF, East Africa; EAS, East Asia; IOC, Indian Ocean; NAF, North Africa; NAM, North America; SAC, South Asia Central; SAE, South Asia East; SAM, South America; SEA, Southeast Asia; SER, SEA islands; WAF, West Africa.

## Sheet: Table S2
Table S2. The statistics for mRNA sequencing.
Group	Repetition	Stage	Reads count (M)	Reads base (G)	Uniquely PE mapped ratio (%)
R91	1	5d	41.38	6.21	84.25
R91	2	5d	45.87	6.88	73.77
R91	3	5d	43.90	6.58	84.47
R91	1	11d	43.36	6.50	85.17
R91	2	11d	41.87	6.28	81.74
R91	3	11d	44.75	6.71	83.60
R91	1	20d	43.70	6.56	83.10
R91	2	20d	43.72	6.56	81.52
R91	3	20d	36.79	5.52	84.28
R91+	1	5d	40.03	6.00	85.85
R91+	2	5d	38.03	5.70	84.33
R91+	3	5d	38.72	5.81	86.03
R91+	1	11d	38.80	5.82	82.51
R91+	2	11d	34.92	5.24	85.87
R91+	3	11d	40.79	6.12	82.04
R91+	1	20d	40.36	6.05	83.90
R91+	2	20d	38.11	5.72	84.56
R91+	3	20d	36.45	5.47	83.93
S1	1	5d	41.40	6.21	85.90
S1	2	5d	38.24	5.74	85.54
S1	3	5d	38.59	5.79	84.29
S1	1	11d	36.88	5.53	83.64
S1	2	11d	37.85	5.68	76.95
S1	3	11d	47.15	7.07	85.23
S1	1	20d	37.57	5.64	88.47
S1	2	20d	41.01	6.15	82.90
S1	3	20d	38.78	5.82	85.65
S1+	1	5d	40.45	6.07	84.52
S1+	2	5d	36.00	5.40	84.28
S1+	3	5d	41.10	6.17	78.01
S1+	2	11d	38.76	5.81	73.61
S1+	3	11d	37.66	5.65	78.60
S1+	3	11d	42.52	6.38	84.95
S1+	1	20d	41.40	6.21	86.59
S1+	2	20d	37.08	5.56	86.43
S1+	3	20d	35.31	5.30	79.24
Total	-	-	1439.31	215.90	-
Average	-	-	39.98	6.00	83.21

## Sheet: Table S3
Table S3. Jasmonic acid (JA) biosynthesis pathway in rice.
Enzyme	Abbreviation	Reference
Fatty acid desaturases	FAD	https://doi.org/10.1038/s41598-019-55648-z
Phospholipases A	PLA	https://doi.org/10.1371/journal.pone.0030947
Phospholipases D	PLD	https://doi.org/10.4161/psb.20385
Lipoxygenases	LOX	https://doi.org/10.1007/s10142-012-0268-1
Allene oxide synthases	AOS	https://doi.org/10.1186/s12864-017-4425-8
Allene oxide cyclases	AOC	https://doi.org/10.1016/S0168-9452(03)00082-7
OPDA reductases	OPR	https://doi.org/10.1007/s00299-011-1002-5
OPC-8:0 CoA ligase 1	OPCL1	KEGG:K10526
Acyl-CoA oxidase	ACX	https://doi.org/10.1016/j.jplph.2006.08.003
Abnormal inflorescence meristem1	AIM1	https://doi.org/10.1105/tpc.16.00665
Ketoacyl-CoA-thiolases	KAT	KEGG:K07513
Jasmonic acid carboxyl methyltransferase	JMT	https://doi.org/10.1111/jipb.12436
JA-amino acid synthetase	JAR	https://doi.org/10.1016/j.bbrc.2018.12.057
Cytochrome P450 monooxygenase subfamily CYP94	CYP94	https://doi.org/10.1186/s12864-017-4425-8

## Sheet: Table S4
Table S4. The seed genes for reconstructing the TOGCNs.
Seeds
LOC_Os01g08140
LOC_Os01g52750
LOC_Os02g44710
LOC_Os03g08624
LOC_Os03g41330
LOC_Os03g57660
LOC_Os05g20020
LOC_Os06g34070
LOC_Os07g17560
LOC_Os08g14190
LOC_Os09g30458
LOC_Os10g37290
LOC_Os12g25200

## Sheet: Table S5
Table S5. Metabolite Concentrations in Resistant (R91) and Susceptible (S1) Rice Accessions at 5, 11, and 20 Days Post Inoculation (dpi) with SRBSDV
metabolite	R91-Mock-20d	R91-Inoc-20d	S1-Mock-20d	S1-Inoc-20d	R91-Mock-11d	R91-Inoc-11d	S1-Mock-11d	S1-Inoc-11d	R91-Mock-5d	R91-Inoc-5d	S1-Mock-5d	S1-Inoc-5d
4-Chlorophenoxyacetic acid	0	0	0	0	0	0	0	0	0	0	0	0
2-Methoxy-5-nitrophenol sodium salt	0.00318333	0.0033579	0.00310189	0.00373727	0.00276869	0.00302855	0.00306965	0.00280295	0.00113333	0.002895	0.00289087	0.00275663
(+)-Abscisic acid	0.113116	0.0931141	0.0982812	0.0947227	0.0815136	0.0849223	0.0777074	0.0906813	0.0946797	0.138117	0.073819	0.0721282
Gibberellin A1	0	0	0	0	0	0	0	0	0	0	0	0
Gibberellin A24	0	0	0	0	0	0	0	0	0	0	0	0
Gibberellin A3	0	0	0	0	0	0	0	0	0	0	0	0
Gibberellin A4	0	0	0	0	0	0	0	0	0	0	0	0
Gibberellin A8	0	0	0.00166639	0	0	0	0.00177814	0	0	0	0	0
Gibberellin A9	0.15502	0.154894	0.156517	0.156225	0.157497	0.157038	0.103785	0.155611	0.156401	0.155674	0.159682	0.156792
jasmonic acid	0.203504	0.0970059	0.256098	0.0831239	0.0878532	0.0833862	0.0864153	0.0595277	0.0407214	0.0766196	0.168478	0.0501743
Maleic hydrazide	0.00965595	0	0.0110303	0.00981019	0.00932854	0.0100492	0.0104459	0.00979081	0.0106072	0.0102196	0.00930722	0.0104005
Sallcylic acid	31.6866	30.9146	39.5055	29.178	19.0442	28.7537	35.7446	34.4814	29.0116	24.0131	28.2446	25.9794
Thidiazuron	0.00126747	0.0011473	0.00118429	0.0011858	0.00110609	0.00132204	0.00136575	0.00138162	0.00119519	0.00115012	0.00114101	0.00113945
Gibberellin A7	0	0	0	0	0	0	0	0	0	0	0	0
1-Naphthaleneacetamide	0.00426025	0.00340487	0.00395885	0	0	0	0.00368109	0.00444063	0.0035108	0.00339221	0.00360194	0
N6-Benzyladenine	0.0165008	0.0131978	0.0133008	0.00770174	0.0146501	0.0144079	0.01223	0.0103747	0.0151554	0.00870556	0.0121431	0.0103243
Kinetin	0.00309883	0.00242863	0.00594677	0.00126064	0.00434918	0.00491991	0.00711582	0.0101328	0.00357315	0.00223371	0.00695117	0.00433081
Brassinolide	0	0.00455293	0.00383242	0.0039345	0.00343679	0	0.0036614	0	0	0	0.00370779	0
Chlorpropham	0.00282495	0	0	0	0	0	0	0	0	0.000865174	0.00265713	0.00263101
cis-Zeatin	0.220762	0.159388	0.303816	0.517019	0.204793	0.0942009	0.357884	0.493312	0.186947	0.0734882	0.440224	0.325094
cis-Zeatin-riboside	2.28833	1.16261	1.2584	2.05582	1.40379	0.880042	0.823149	1.28309	3.69931	2.09134	1.57539	1.35484
dihydrozeatin	0.0356234	0.0232913	0.0441725	0.0487951	0.0235298	0.0221062	0.0424088	0.0267324	0.0102731	0.0098942	0.0137567	0.013999
Ethychlozate	0.00460598	0	0	0	0.00298928	0.00324185	0	0	0	0	0	0
3-Indoleacetic acid	0.796945	0.529155	0.904093	0.993922	1.18451	0.755611	0.859398	1.12285	1.04474	0.746707	1.10698	0.769762
N-(3-Indolylacetyl)-L-alanine	0.0893752	0.0881413	0.0891843	0.0885483	0.0891471	0.089646	0.0906493	0.0886133	0.0866013	0.0876803	0.0898732	0.0872609
Indole-3-acetyl-L-aspartic Acid	0.105482	0.0329261	0.0343165	0.0703592	0.0420273	0.0858817	0.033705	0.042806	0.0450297	0.044613	0.0500304	0.0429903
N-(3-Indolylacetyl)-L-leucine	0.00328431	0.00333291	0.00321997	0.00343143	0.00333423	0.00322481	0.00319736	0.0031667	0.00334293	0.00321397	0.00348459	0.0032773
N-(3-Indolylacetyl)-L-phenylalanine	0	0	0	0	0	0	0	0	0	0	0	0
Indole-3-acetyl-L-tryptophan	0.00369851	0.00356986	0.00427815	0	0	0	0.00390786	0	0	0	0.00342879	0.00443915
3-Indolebutyric acid	0	0	0.0188906	0	0.0184492	0	0.0183558	0.0201063	0.0195504	0.0204548	0	0
N6-isopentenyladenine	0.0124818	0.0180554	0.0169113	0.011485	0.00776761	0.00783205	0.0134266	0.0134831	0.00518618	0.0054771	0.0120358	0.00796238
3-Indolepropionic acid	1.03655	0.740146	0.874966	1.48082	0.848037	1.14238	0.763384	1.79166	2.09255	0.897981	1.48149	0.928802
N6-(Δ2-Isopentenyl)adenosine	0.547471	0.267706	0.442987	0.459661	0.289935	0.405824	0.309062	0.281458	0.702057	0.874269	0.713146	0.465989
Methyl Jasmonate	0.0286185	0	0.339548	0.074486	0.0148932	0.00955666	0.0797533	0.0331843	0.00975026	0.0124328	0.0592378	0.0347954
meta-TOPOLIN	0.00453359	0.00389099	0.00857492	0.00895374	0.00449688	0.00426172	0.0071006	0.00594923	0.00601924	0.00395916	0.00591464	0.00469564
N,N'-Diphenylurea	0.000740264	0.000485087	0.000682781	0	0.00142902	0.000693798	0.000795756	0.000299883	0.000967642	0.00130672	0.0087824	0.00286891
12-oxoPhytodienoicAcid	31.3118	36.6598	39.4274	38.0988	30.4199	32.8486	32.7452	38.3763	39.2719	33.188	28.3313	36.835
Paclobutrazol	0.0142391	0.0101602	0.0552215	0.0615286	0.00968356	0.0111125	0.0152313	0.0148751	0.0219007	0.0132439	0.0097391	0.0107638
trans-Zeatin	0.0883936	0.0215981	0.0765465	0.084635	0.0149125	0.036369	0.0318348	0.0320574	0.00145977	0.00348136	0.0147257	0.0106141
trans-Zeatin-riboside	1.42075	0.22972	1.0039	1.31257	0.471996	1.8661	0.331651	0.161491	0.137803	0.359773	0.245826	0.209329
Uniconazole	0	0	0	0	0	0	0	0	0	0	0	0
The table presents metabolite concentrations in resistant (R91) and susceptible (S1) rice accessions at three time points: 5, 11, and 20 days post-inoculation (dpi) with SRBSDV. "Mock" refers to mock-inoculated (control) plants, while "Inoc" indicates SRBSDV-inoculated plants.

## Sheet: Table S6
Table S6. The statistics for differential gene expression analysis.
Contrast	Timepoint (dpi)	Group	Count
R91+ vs. R91	5	Down	257
R91+ vs. R91	5	Up	1,804
R91+ vs. R91	11	Down	1,908
R91+ vs. R91	11	Up	99
R91+ vs. R91	20	Down	215
R91+ vs. R91	20	Up	306
S1+ vs. S1	5	Down	392
S1+ vs. S1	5	Up	244
S1+ vs. S1	11	Down	135
S1+ vs. S1	11	Up	31
S1+ vs. S1	20	Down	53
S1+ vs. S1	20	Up	537

## Sheet: Table S7
Table S7. The statistics for resistant- and susceptible-specific TOGCNs.
Network	Sub-network	Edge	Gene	TF	Average degree
Resistant (R91+)-specific	L1	1,844	171	66	43.13
	L2	5,994	1,646	30	14.57
	L3	93	163	27	2.28
	L4	59	213	11	1.11
	L5	249	152	24	6.55
	L6	5,049	620	51	32.57
	L7	4,822	702	55	27.48
	L8	359	354	18	4.06
	L9	45	146	9	1.23
	Early	23,673	1,980	123	47.82
	Transitional	6,711	985	86	27.25
	Terminal	6,611	1,202	82	22.00
	Total	44,087	4,167	291	42.32
Susceptible (S1+)-specific	L1	266	82	18	12.98
	L2	1,101	600	23	7.34
	L3	1,197	397	38	12.06
	L4	6,285	822	43	30.58
	L5	7,830	623	60	50.27
	L6	358	284	33	5.04
	L7	163	188	27	3.47
	L8	92	230	15	1.60
	L9	100	173	15	2.31
	L10	42	162	18	1.04
	L11	60	115	10	2.09
	Early	5,344	1,079	79	19.81
	Transitional	25,095	1,917	163	52.36
	Terminal	918	680	52	5.40
	Total	33,884	3,676	294	36.87

## Sheet: Table S8
Table S8. Distribution and rapid response genes in JA biosynthesis pathway in rice.
Family	Size	Rapid response gene	Percentage (%)
FAD	20	15	75
PLD	14	10	71.42
AOS	5	3	60
JAR	4	2	50
OPCL1	2	1	50
PLA	31	15	48.38
ACX	3	1	33.33
AIM1	3	1	33.33
CYP94	21	6	28.57
AOC	1	0	0
JMT	1	0	0
KAT	2	0	0
LOX	8	0	0
OPR	7	0	0
Total	121	54	44.63
Note: Genes that are highly expressed in R91+ during the early stage and in S1+ during the late stage are defined as rapid response genes.

## Sheet: Table S9
Table S9. Statistics of JA enzymatic genes upregulated at three different time points.
Group	R91	R91+	S1	S1+
5d	30 (24.79%)	54 (44.63%)	50 (41.32%)	36 (29.75%)
11d	55 (45.45%)	6 (4.96%)	30 (24.79%)	48 (39.67%)
20d	28 (23.14%)	50 (41.32%)	33 (27.27%)	29 (23.97%)
Others	8 (6.61%)	11 (9.09%)	8 (6.61%)	8 (6.61%)
Note: "Others" means no significantly differentially expressed genes between different time points.

## Sheet: Table S10
Table S10. Distribution of edges, genes, TF, and JA enzymatic genes across different sub-networks of resistant (R91+)-specific and susceptible (S1+)-specific TOGCNs.
Network	Sub-network	Edge	Gene	TF	JA
Resistant (R91+)-specific	Early	716	114	109	7
	Transitional	400	63	57	4
	Terminal	268	80	65	15
	Total	1781	257	231	26
Susceptible (S1+)-specific	Early	110	40	37	3
	Transitional	1343	147	132	15
	Terminal	24	27	20	7
	Total	1540	214	189	25

[truncated: 2 more sheets: Table S11, Table S12]
